# Supplementary material for: Highly mutated antibodies capable of neutralizing N276 glycan-deficient HIV after a single immunization with an Env trimer
Source: PubMed Central journal article supplement (PMC8924373; doi:10.1016/j.celrep.2022.110485), 2022-03-08
Supplement: mmc1.pdf [file mmc1.pdf]

**Cell Reports, Volume 38**

**Supplemental information**

**Highly mutated antibodies capable of neutralizing**

**N276 glycan-deficient HIV after a single**

**immunization with an Env trimer**

**Jeong Hyun Lee, Catherine Nakao, Michael Appel, Amber Le, Elise Landais, Oleksandr Kalyuzhniy, Xiaozhen Hu, Alessia Liguori, Tina-Marie Mullen, Bettina Groschel, Robert K. Abbott, Devin Sok, William R. Schief, and Shane Crotty**

**A**

|                     |                                                                                           |
|---------------------|-------------------------------------------------------------------------------------------|
| BG505 SOSIP         | AENLWVTVYVGVVWVWKAETTLFCASDAKAYETEKHNWVATHACVPTDPNPQEIHLENVTEEFNMWKNMVEQMHTDIIISLWDQSLK   |
| BG505 SOSIP-GT3     | AENLWVTVYVGVVWVWKAETTLFCASDAKAYETEKHNWVATHACVPTDPNPQEIHLENVTEEFNMWKNMVEQMHTDIIISLWDQSLK   |
| BG505 MD39-GT3.1    | AENLWVTVYVGVVWVWKAETTLFCASDAKAYETEKHNWVATHACVPTDPNPQEIHLENVTEEFNMWKNMVEQMHTDIIISLWDQSLK   |
| BG505 SOSIPv4.1-GT1 | AENLWVTVYVGVVWVWKAETTLFCASDAKAYETKHNWVATHACVPTDPNPQEIHLENVTEEFNMWKNMVEQMHTDIIISLWDQSLK    |
|                     |                                                                                           |
| BG505 SOSIP         | PCVKLTPLCVTLQCTNVTNNITDDMRGELKNCFSNMTELDRDKKQKVYSLFYRLDVVQINENQGNRSNNSKEYRLINCNLSAITQA    |
| BG505 SOSIP-GT3     | PCVKLTPLCVTLQCTNVTNNITDDMRGELKNCFSNMTELDRDKKQKVYSLFYRLDVVQINENQGNRSNNSKEYRLINCNLSAITQA    |
| BG505 MD39-GT3.1    | PCVKLTPLCVTLQCTNVTNNITDDMRGELKNCFSNMTELDRDKKQKVYSLFYRLDVVQINENQGNRSNNSKEYRLINCNLSAITQA    |
| BG505 SOSIPv4.1-GT1 | PCVKLTPLCVTLQCTNVTNNITDDMRGELKNCFSNMTELDRDKRQKVHALFYKLDIVP INENQNT-----SYRLINCNLSAITQA    |
|                     |                                                                                           |
| BG505 SOSIP         | CPKVSFEPIPIHYCAPAGFAILKCKDKKFNFTGPCPSVSTVQCTHGIKPVVSTQLLNGSLAEEVMIIRSENITNNAKNIILVQFNTP   |
| BG505 SOSIP-GT3     | CPKVSFEPIPIHYCAPAGFAILKCKDKKFNFTGPCPSVSTVQCTHGIKPVVSTQLLNGSLAEEVMIIRSEDFRNNAKNIILVQFNTP   |
| BG505 MD39-GT3.1    | CPKVSFEPIPIHYCAPAGFAILKCKDKKFNFTGPCPSVSTVQCTHGIKPVVSTQLLNGSLAEEVIRSEDFRNNAKNIILVQFNTP     |
| BG505 SOSIPv4.1-GT1 | CPKVSFEPIPIHYCAPAGFAILKCKDKKFNFTGPCPSVSTVQCTHGIKPVVSTQLLNGSLAEEVMIIRSEDFIRNNAKNIILVQFNTP  |
|                     |                                                                                           |
| BG505 SOSIP         | VQINCTRPNNTRKRSIRIGPQAFYATGDIIGDIRQAHCVNSKATWNETLGKVVQQLRKHFGNNTIIRFANSSGGDLEVTTHSFNCG    |
| BG505 SOSIP-GT3     | VQINCTRPNNTRKRSIRIGPQAFYATGDIIGDIRQAHCVNSKATWNETLGKVVQQLRKHFGNNTIIRFAPSSGGDLEVMNHSFNCG    |
| BG505 MD39-GT3.1    | VQINCTRPNNNTVKSIRIGPQAFYATGDIIGDIRQAHCVNSKATWNETLGKVVQQLRKHFGNNTIIRFAPSSGGDLEVMNHSFNCG    |
| BG505 SOSIPv4.1-GT1 | VQINCTRPNNTRKRSIRIGPQAFYATGDIIGDIRQAHCVNSKATWNETLGKVVQQLRKHFGNNTIIRFANSSGGDLEVTTHSFNCG    |
|                     |                                                                                           |
| BG505 SOSIP         | GEFFYCNSTGLFNSTWISNTSVQGSNSTGSNDSITLPCRKQIINMWQRIGQAMYAPPIQGVIRCVSNITGLILTRDGGSTNTTET     |
| BG505 SOSIP-GT3     | GEFFYCNSTGLFNSTWISNTSVQGSNSTGSNDSITLPCRKQIINMWQRIGQAMYAPPIQGVIRCVSNITGLILVRDGGYTNSNTET    |
| BG505 MD39-GT3.1    | GEFFYCNSTGLFNSTWISNTSVQGSNSTGSNDSITLPCRKQIINMWQRIGQAMYAPPIQGVIRCVSNITGLILVRDGGYTNSNTET    |
| BG505 SOSIPv4.1-GT1 | GEFFYCDTSGLFNSTWISNTSVQGSNSTGSNDSITLPCRKQIINMWQRIGQAMYAPPIQGVIRCVSNITGLILTRDGGSTDTTET     |
|                     |                                                                                           |
| BG505 SOSIP         | FRPGGDMRDNRSELYKYKVVKIEPLGVAPTRCKRRVVGRRRRRAVGI GAVFLGLGAAGSTMGAASMTLTVQARNLLSGIVQQQ      |
| BG505 SOSIP-GT3     | FRPGGDMRDNRSELYKYKVVKIEPLGVAPTRCKRRVVGRRRRRAVGI GAVFLGLGAAGSTMGAASMTLTVQARNLLSGIVQQQ      |
| BG505 MD39-GT3.1    | FRPGGDMRDNRSELYKYKVVKIEPLGVAPTRCKRRVVGRRRRRAVGI GAVSLGLFLGAAGSTMGAASMTLTVQARNLLSGIVQQQ    |
| BG505 SOSIPv4.1-GT1 | FRPSGGDMRDNRSELYKYKVVKIEPLGVAPTRCKRRVVGRRRRRAVGI GAVFLGLGAAGSTMGAASMTLTVQARNLLSGIVQQQ     |
|                     |                                                                                           |
| BG505 SOSIP         | SNLLRAPEAQHLLKLTWVGIKQLQARVLAVERYLRDQQLLGIWGC SGKLI CCTNVPWNSSWSNRNLSEIWDNMTWLQWDKEISNYT  |
| BG505 SOSIP-GT3     | SNLLRAPEAQHLLKLTWVGIKQLQARVLAVERYLRDQQLLGIWGC SGKLI CCTNVPWNSSWSNRNLSEIWDNMTWLQWDKEISNYT  |
| BG505 MD39-GT3.1    | SNLLRAPEPQQHLLKDTHWGIKQLQARVLAVERYLRDQQLLGIWGC SGKLI CCTNVPWNSSWSNRNLSEIWDNMTWLQWDKEISNYT |
| BG505 SOSIPv4.1-GT1 | SNLLRAPEAQHLLKLTWVGIKQLQARVLAVERYLRDQQLLGIWGC SGKLI CCTNVPWNSSWSNRNLSEIWDNMTWLQWDKEISNYT  |
|                     |                                                                                           |
| BG505 SOSIP         | QIIYGLLEESQNQQEKNEQDLLALD                                                                 |
| BG505 SOSIP-GT3     | QIIYGLLEESQNQQEKNEQDLLALD                                                                 |
| BG505 MD39-GT3.1    | QIIYGLLEESQNQQEKNEQDLLALD                                                                 |
| BG505 SOSIPv4.1-GT1 | QIIYGLLEESQNQQEKNEQDLLALD                                                                 |

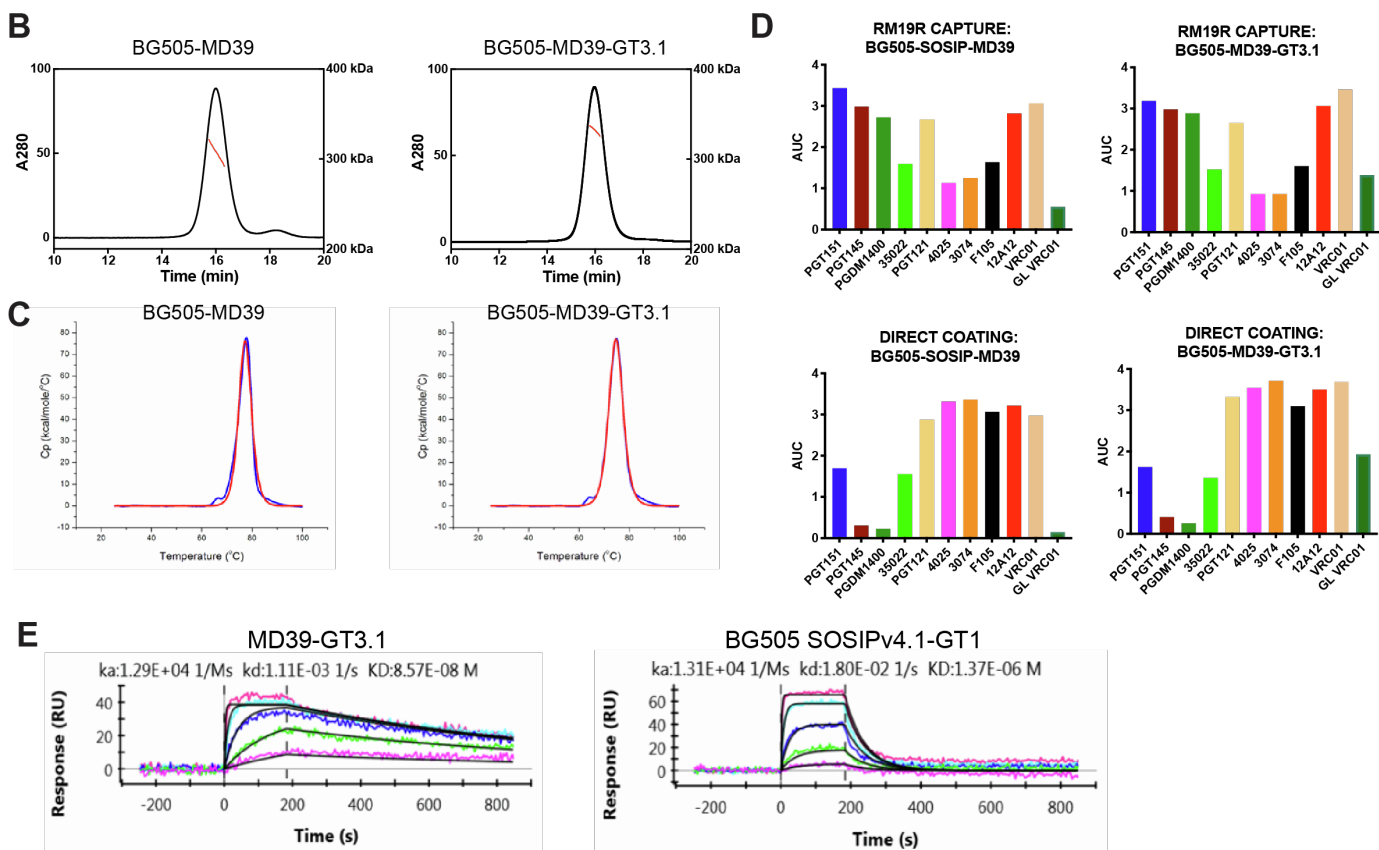

**Figure S1. Characterization of the MD39-GT3.1 trimer immunogen and related immunogens, related to Figures 1 and 2.**

- (A)** The sequence of BG505 SOSIP trimer and BG505 SOSIP-based CD4bs GT trimer constructs. Modifications from the parent BG505 SOSIP sequence is shown in red. The furin cleavage site between gp120 and gp41 is shown in bold font. The 15mer epitope of HYCAP Tg CD4 T cells is underlined.
- (B)** Size exclusion chromatography-multiangle light scattering (SEC-MALS) traces for BG505 MD39 and BG505 MD39-GT3.1. The left y-axis is normalized A280 and right y-axis is the molecular weight of protein and glycan. The MW assessed by protein-conjugate analysis is shown as the red line inside the peak. Theoretical protein MW is 214 kDa in both cases.
- (C)** Thermal stability of BG505 MD39 and BG505 MD39-GT3.1 measured by differential scanning calorimetry (DSC). The raw data are shown as blue solid line, and the fit is shown as red line. Melting temperature ( $T_m$ ) values from the fit are shown.
- (D)** Antigenic profiles measured by ELISA for BG505 MD39 and BG505 MD39-GT3.1, with trimers either captured by the base binding mAb RM19R (Cottrell et al., 2020) in order to preserve trimer quaternary structure or coated directly onto the ELISA plate so as to disrupt trimer quaternary structure.
- (E)** SPR kinetic analysis of gIVRC01 Fab binding to MD39-GT3.1 trimer (left) and BG505 SOSIPv4.1-GT1 (right) captured on sensor by PGT121. The gIVRC01 Fab analyte was tested at a top concentration of 30.347  $\mu\text{M}$  and four successive 4-fold dilutions. The dissociation constant from this kinetic fit was 86 nM and 1.4  $\mu\text{M}$ , respectively.

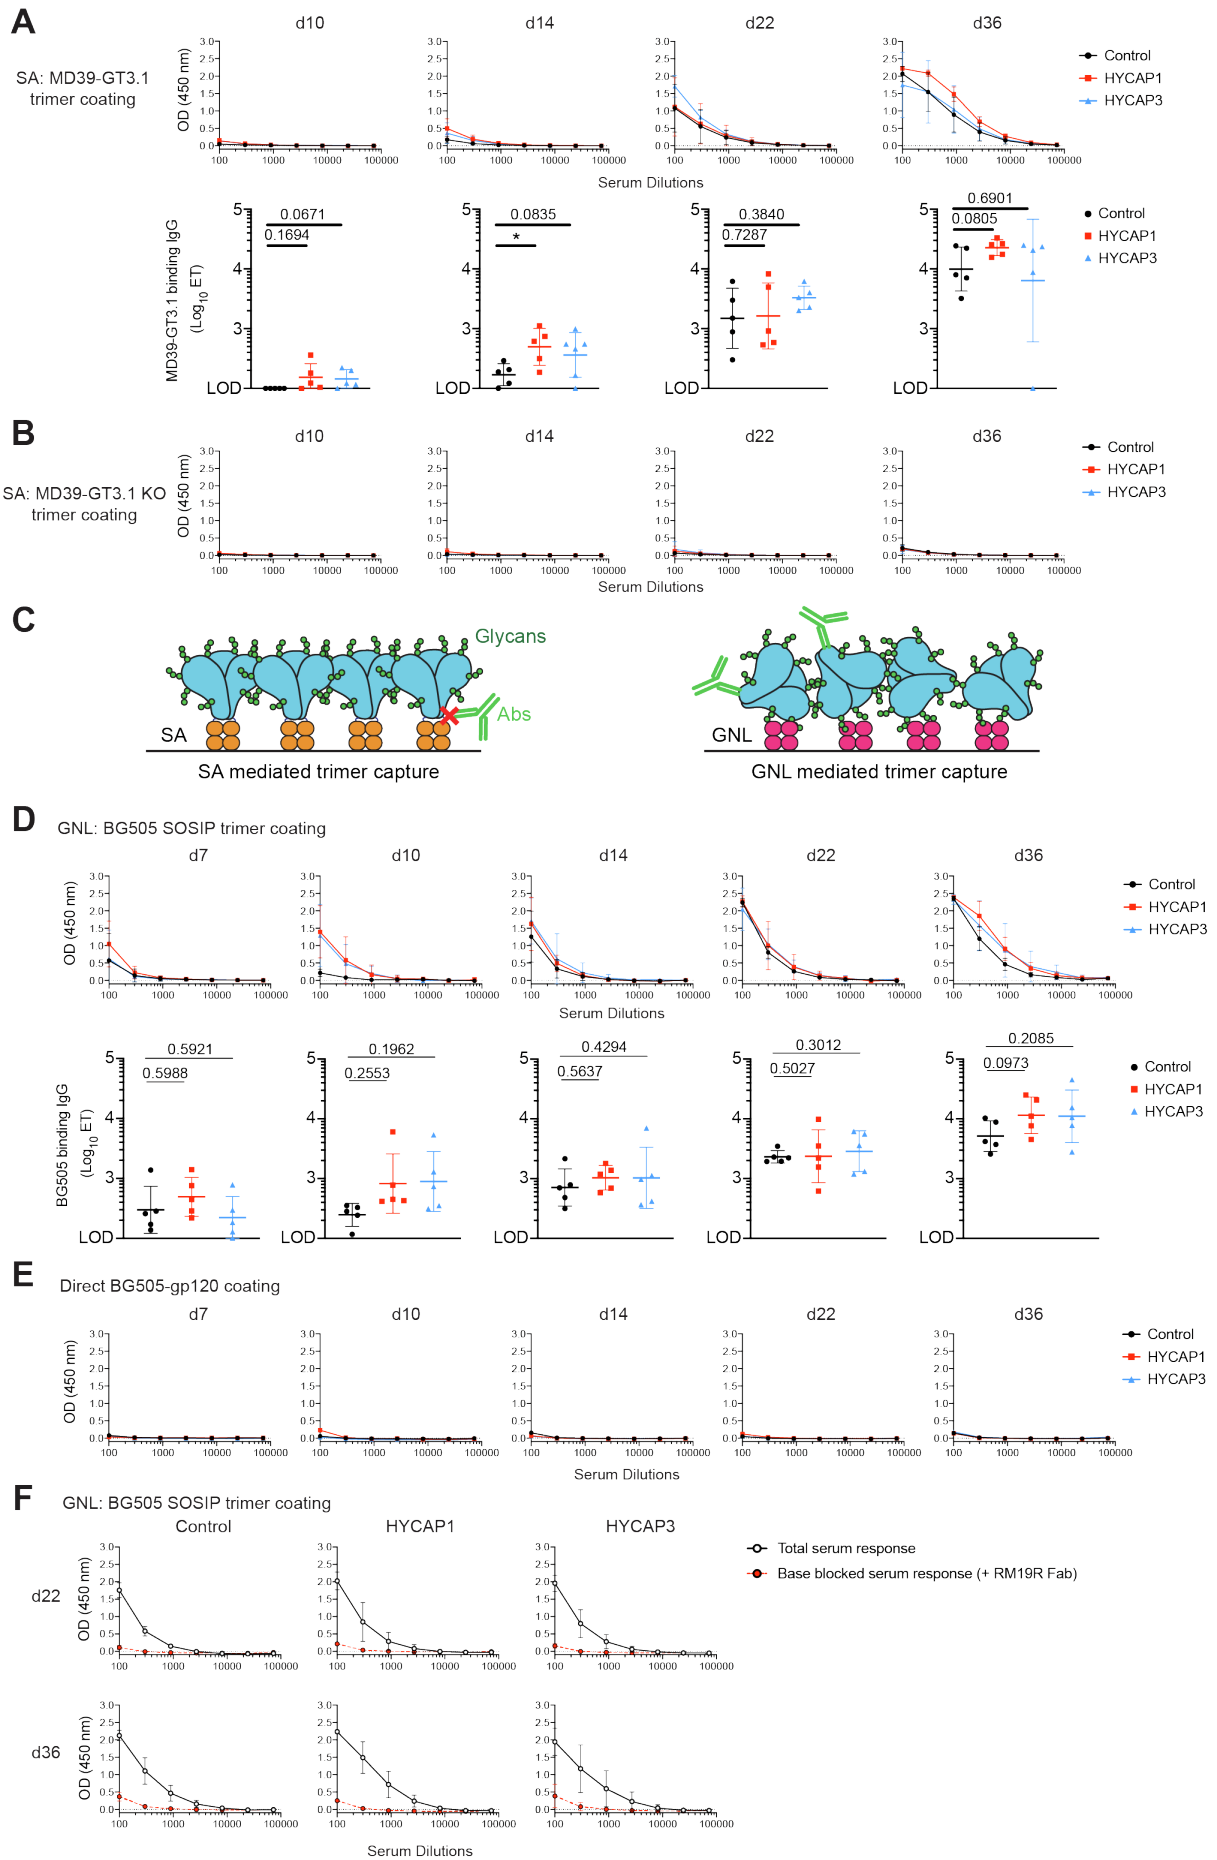

**Figure S2. Serum IgG responses from MD39-GT3.1 immunized mice, related to Figure 2.**

- (A)** MD39-GT3.1 trimer-binding serum IgG measured by ELISA and endpoint titers (ET). Biotinylated MD39-GT3.1 trimers were captured on to SA coated plates.
- (B)** As in (A), but serum IgG binding to the MD39-GT3.1 KO trimer.
- (C)** Comparison of SA-biotinylated trimer capture and GNL-trimer capture. SA-based trimer capture results in C-terminus oriented binding of the trimer on to ELISA plates, sterically occluding the trimer base epitope. GNL binds mannose residues and captures Env trimers in random orientations.
- (D)** BG505 SOSIP trimer-binding serum IgG measured by ELISA and ET. Plates were initially coated with GNL, and trimer was captured onto the GNL coated plates. P-values calculated by two-tailed Student's t-tests.
- (E)** IgG serum ELISA to detect monomeric BG505 gp120. Recombinant BG505 gp120 was directly coated onto ELISA plates.
- (F)** As in (D) for d22 and d36 (black lines), but with the respective trimer base blocking ELISA performed in parallel (red lines). To block the base epitope, RM19R Fab was added to the trimers prior to the addition of mouse serum.

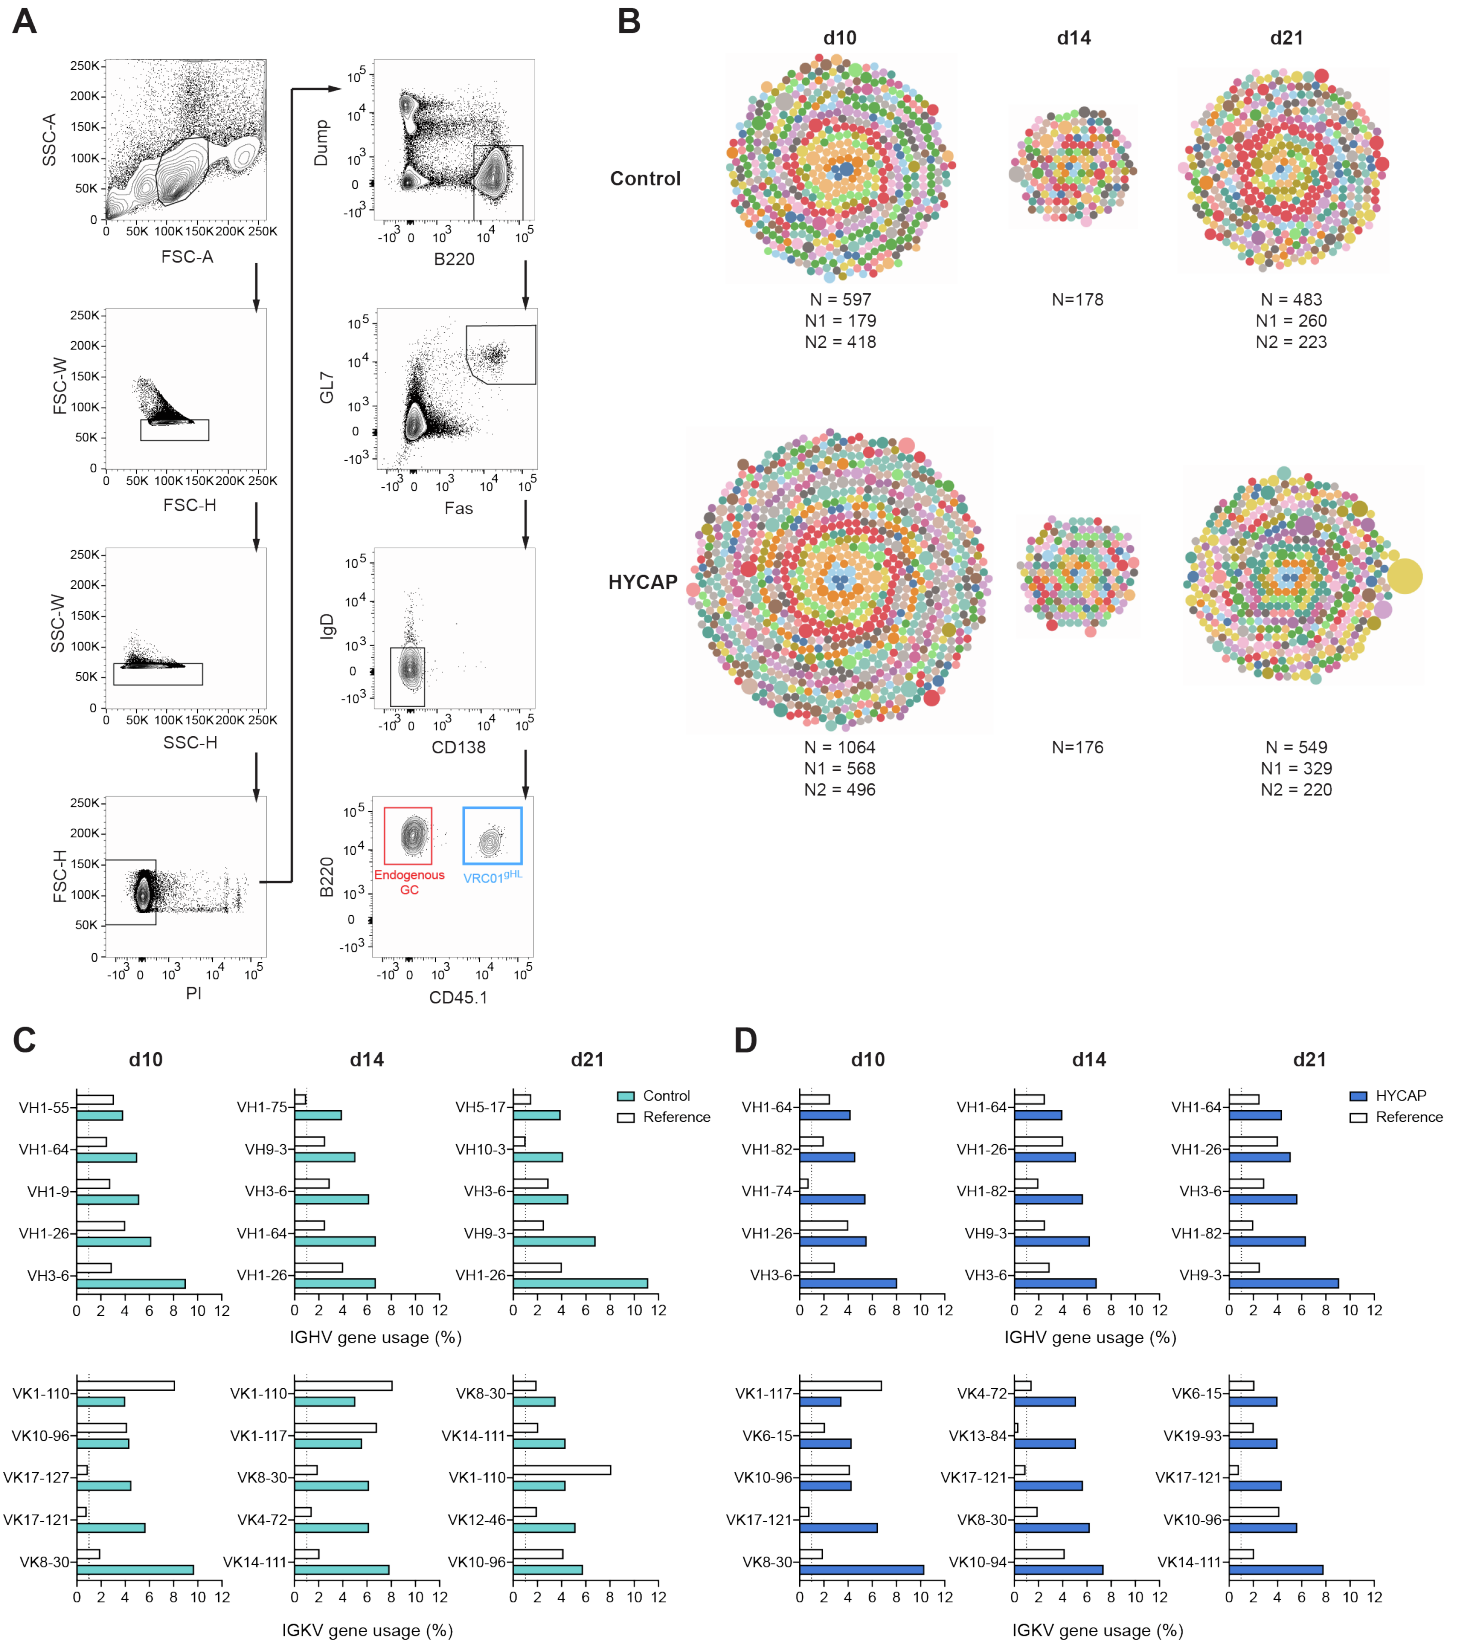

**Figure S3. Analysis of endogenous B<sub>GC</sub> BCR sequences in MD39-GT3.1 trimer immunized mice, related to Figure 2.**

**(A)** Endogenous B<sub>GC</sub> cell and VRCO19<sup>HL</sup> B<sub>GC</sub> cell sort strategy for sequencing. Dump: CD4, CD8a, NK1.1, Gr-1.

**(B)** Diversity of endogenous B<sub>GC</sub> cells. Each circle denotes a unique clonotype, defined by paired HC VDJ-LC VJ genes. The size of each circle is directly proportional to the number of clones observed for that clonotype. Circles are colored by IGHV-genes although the colors are not mutually exclusive due to the large number of IGHV genes observed. Distinct

clones using the same IGHV-genes are proximally clustered. N = total number of paired sequences obtained from two independent experiments; N1 = sequences from first experiment, pooled from 4 mice each for both control and HYCAP3 groups; N2 = sequences from a second experiment, pooled from 5 mice in the control group, pooled from 10 mice in the HYCAP group (5 mice from HYCAP1 and HYCAP3 groups each). B cells from d14 were only sequenced in the second experiment.

**(C)** The top 5 most used IGHV (VH, upper) and IGKV (VK, lower) genes among HC-LC paired endogenous B<sub>GC</sub> cells after 10, 14 or 21 days post immunization in the control group. The reference V-gene usage frequencies were derived from V-gene usage observed unimmunized C57BL/6J splenic B cells (Rettig et al., 2018). Dotted line indicates 1%.

**(D)** As in (C) but analysis of sequences from mice that received HYCAP1 and HYCAP3 CD4 T cells by adoptive transfer.

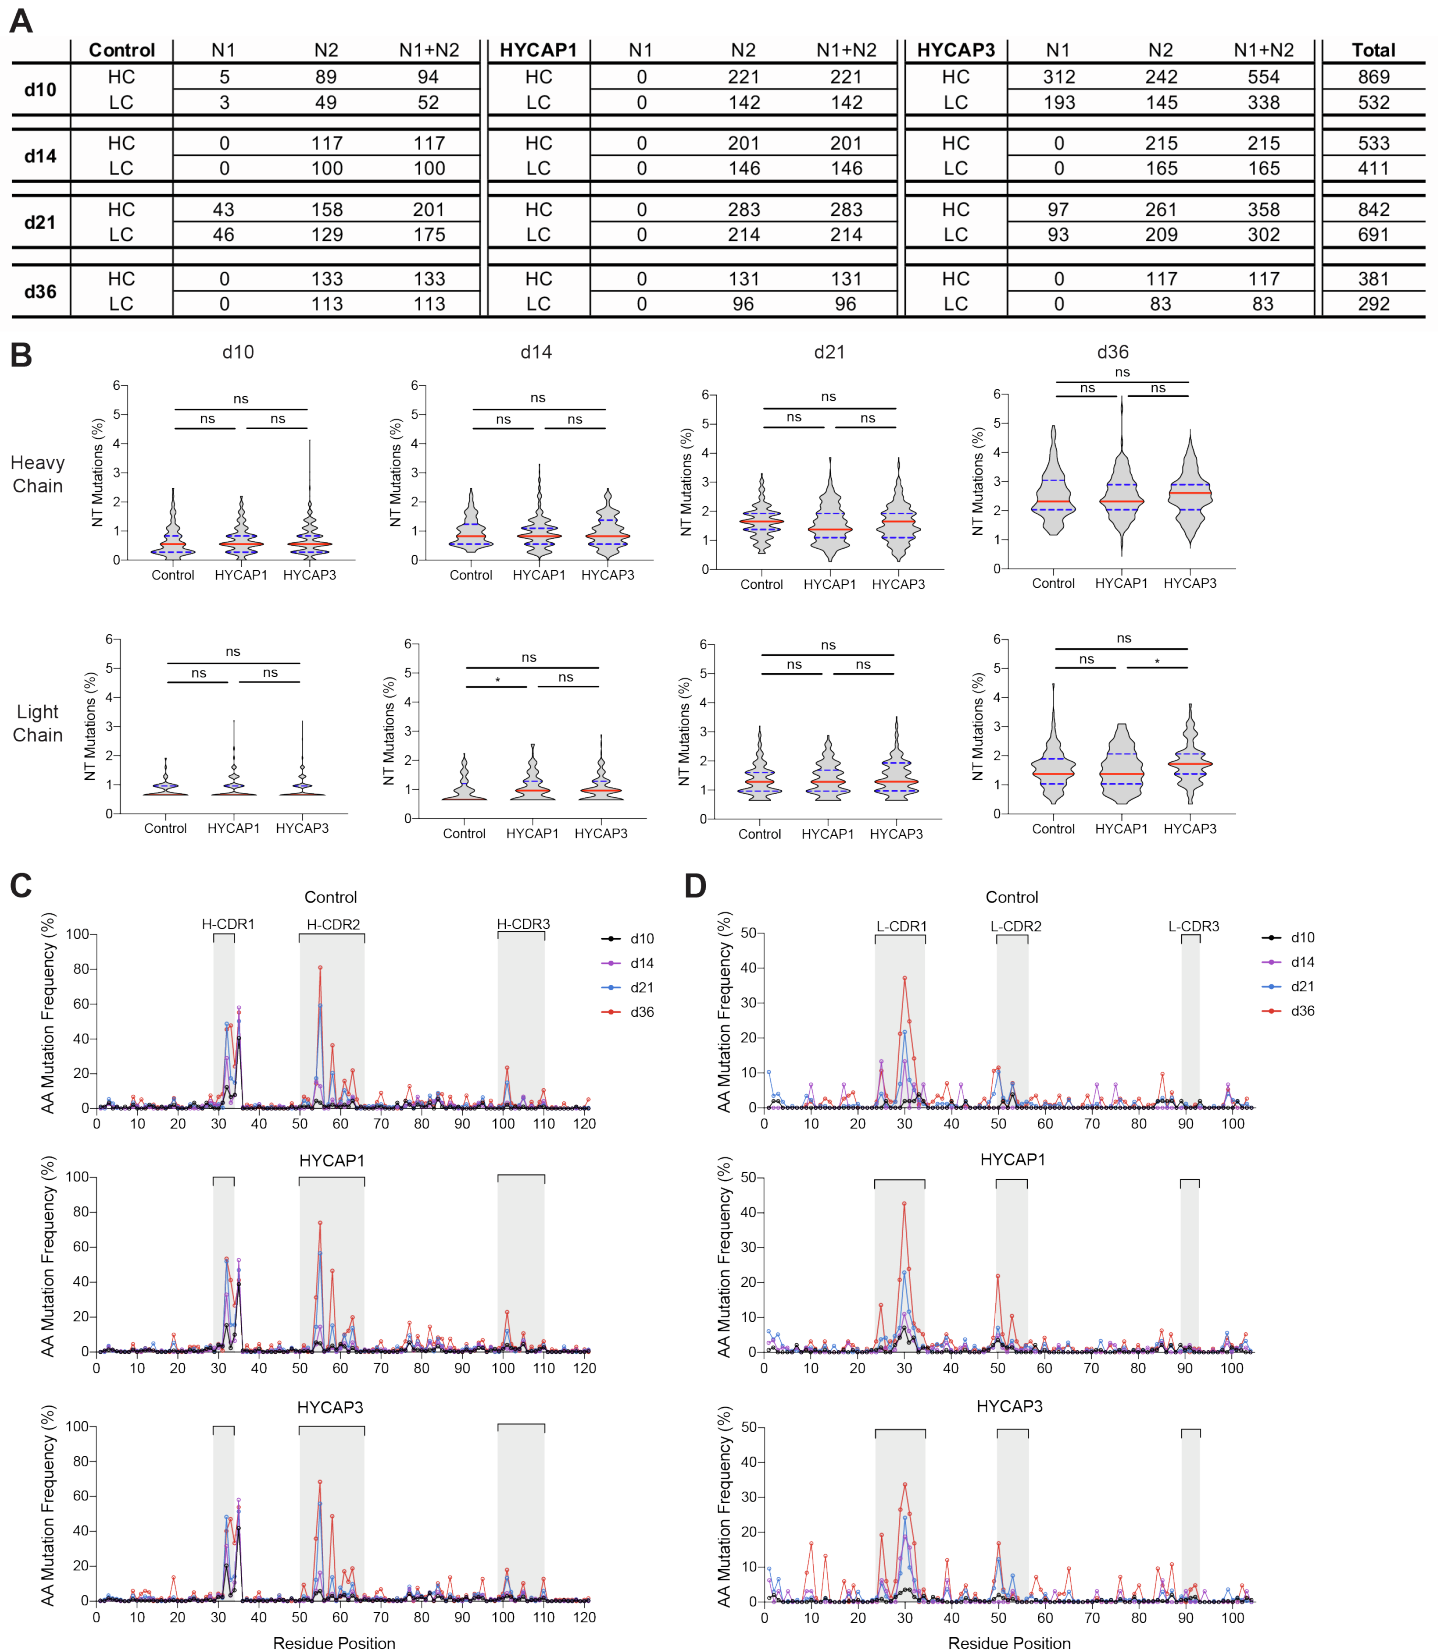

**Figure S4. Sequencing of VRC01<sup>9HL</sup> cells, related to Figure 3.**

**(A)** Number of B<sub>6</sub>C VRC01<sup>9HL</sup> HC and LC sequences analyzed. N1 and N2 indicate two independent experiments. D10, 14, 21 B cells were sequenced using the 10X Genomics platform and pooled from 4 mice per group for each experiment. D36 sequences were obtained by Sanger sequencing from 4 mice within each transfer group.

**(B)** Violin plots of % nucleotide (NT) mutations for the data shown in Figure 2A. The denominator for d10, 14, 21 sequences is 363 NT residues for HC and 312 residues for LC. The denominator for d36 sequences is 345 NT residues for HC and 290 residues for LC.



**(C)** Per residue HC AA mutations in the three experimental groups.

**(D)** Per residue LC AA mutations in the three experimental groups.

| Virus Strain            | Tier | Clade | M1      |         | M2       |         | M3       |         | M4      |         | M5       |          | M6       |          | M7       |          | M8      |          | M9       |          |
|-------------------------|------|-------|---------|---------|----------|---------|----------|---------|---------|---------|----------|----------|----------|----------|----------|----------|---------|----------|----------|----------|
|                         |      |       | T       | S       | T        | S       | T        | S       | T       | S       | T        | S        | T        | S        | T        | S        | T       | S        | T        | S        |
| 191084 B7-19_N276A      | 2    | A     | 0.02831 | 0.00295 | 0.02851  | 0.00276 | 1.07981  | 0.05221 | 0.02358 | 0.00146 | 26.43695 | 0.11549  | 9.25587  | 0.06637  | 1.24439  | 0.00542  | 0.07767 | 0.00225  | 0.23643  | 0.00289  |
| BG505_N276A             | 2    | A     | 3.87232 | NT      | 21.55737 | NT      | 17.87130 | NT      | 8.80939 | NT      | NN       | NT       | 66.33857 | NT       | 76.17481 | NT       | 0.53851 | NT       | 79.94976 | NT       |
| BG505_N276D             | 2    | A     | 3.06971 | NT      | 40.76442 | NT      | 3.46174  | NT      | 0.49062 | NT      | 95.17247 | NT       | 17.85259 | NT       | 3.84156  | NT       | 0.05780 | NT       | 1.14787  | NT       |
| REJO4541.67_N276A       | 2    | B     | 3.79945 | 0.01394 | 44.31766 | 0.10066 | 11.37000 | 0.39231 | 8.65472 | 0.01772 | NN       | NN       | NN       | 22.88683 | NN       | NN       | NN      | 38.42655 | NN       | 93.06217 |
| 1012_11_TC21_3257_N276A | 1B   | B     | 0.12607 | 0.02426 | 0.44165  | 0.01760 | 6.86379  | 0.22708 | 7.33115 | 0.09931 | NN       | 95.86216 | NN       | 37.24879 | 15.54891 | 0.45328  | 5.41503 | 0.03266  | 21.41162 | 0.11809  |
| HIV-001428-2.42_N276A   | 2    | C     | 0.01680 | 0.00082 | 7.89591  | 0.01182 | 2.64889  | 0.03082 | 0.60076 | 0.00297 | NN       | 15.01911 | 21.68769 | 0.15419  | 19.81655 | 0.14983  | 0.04261 | 0.00057  | 1.20000  | 0.00210  |
| 3301.v1.c24_N276A       | 2    | AC    | NN      | 0.06797 | NN       | 0.09463 | NN       | 0.48500 | NN      | 0.09445 | NN       | 1.07127  | NN       | 6.92608  | NN       | 2.79699  | NN      | 0.03851  | NN       | 0.02381  |
| 6041.v3.c23_N276A       | 2    | AE    | NN      | 0.62301 | NN       | NN      | NN       | NN      | NN      | 5.48987 | NN       | NN       | NN       | NN       | NN       | 29.68087 | 0.11642 | NN       | 5.32711  |          |
| 92TH021_N276A           | 2    | AE    | NN      | 0.13069 | NN       | NN      | NN       | NN      | NN      | NN      | NN       | NN       | NN       | NN       | NN       | NN       | NN      | NN       | NN       |          |
| 191084 B7-19_N276D      | 2    | A     | 0.07481 | 0.00304 | 0.04816  | 0.00324 | 0.25399  | 0.00722 | 0.02595 | 0.00212 | 0.95622  | 0.01078  | 0.11903  | 0.00379  | 0.04188  | 0.00283  | 0.02837 | 0.00215  | 0.04985  | 0.00337  |
| SC422661.8_N276D        | 2    | B     | 1.72409 | NT      | 3.75924  | NT      | 8.09772  | NT      | 0.32041 | NT      | NN       | NT       | NT       | 24.88707 | NT       | 16.12163 | NT      | 78.30517 | NT       |          |
| HIV-001428-2.42_N276D   | 2    | C     | 0.02598 | 0.00085 | 15.10950 | 0.01596 | 1.14572  | 0.00733 | 0.16154 | 0.00250 | NN       | 2.77310  | 34.96976 | 0.14733  | 37.50414 | 0.03775  | 0.01913 | 0.00037  | 0.23609  | 0.00125  |
| HIV-0815.v3.c3_N276D    | 2    | ACD   | 4.12250 | NT      | NN       | NT      | NN       | NT      | 2.30058 | NT      | 50.95341 | NT       | NN       | NT       | NN       | NT       | NN      | 0.73764  | NT       | NT       |
| MLV                     |      |       | NN      | NN      | NN       | NN      | NN       | NN      | NN      | NN      | NN       | NN       | NN       | NN       | NN       | NN       | NN      | NN       | NN       | NN       |

| Virus Strain            | Tier | Clade | M10      |          | M11      |          | M12     |         | M13     |         | M14 |          | M15 |          | E7       |         | E11      |         | gIVRC01 |          | VRC01   |         |
|-------------------------|------|-------|----------|----------|----------|----------|---------|---------|---------|---------|-----|----------|-----|----------|----------|---------|----------|---------|---------|----------|---------|---------|
|                         |      |       | T        | S        | T        | S        | T       | S       | T       | S       | T   | S        | T   | S        | T        | S       | T        | S       | T       | S        | T       | S       |
| 191084 B7-19_N276A      | 2    | A     | 5.50763  | 0.02893  | 9.50712  | 0.03078  | 0.05328 | 0.00272 | 0.00746 | 0.00049 | NN  | 79.73813 | NN  | 28.77998 | 2.77038  | 0.02073 | 0.02364  | 0.00149 | NN      | NN       | 0.03100 | 0.00092 |
| BG505_N276A             | 2    | A     | 24.89845 | NT       | NN       | NT       | NN      | NT      | 1.00591 | NT      | NN  | ND       | NN  | ND       | NN       | NT      | NN       | NT      | NN      | ND       | 0.01300 | NT      |
| BG505_N276D             | 2    | A     | 0.10831  | NT       | 0.64819  | NT       | 3.72484 | NT      | 0.00850 | NT      | NN  | ND       | NN  | ND       | 30.75698 | NT      | 15.40579 | NT      | NN      | ND       | 0.01100 | NT      |
| REJO4541.67_N276A       | 2    | B     | NN       | 63.44921 | NN       | NN       | NN      | 0.39616 | 0.00805 | 0.00001 | NN  | NN       | NN  | NN       | 27.23893 | 0.50054 | 16.35902 | 0.57058 | NN      | NN       | 0.02100 | 0.00350 |
| 1012_11_TC21_3257_N276A | 1B   | B     | NN       | NN       | NN       | 21.65742 | 0.28868 | 0.03487 | 0.03405 | 0.00393 | NN  | NN       | NN  | NN       | 89.60507 | 6.88754 | 0.80414  | 0.01075 | NN      | NN       | 0.05400 | 0.81000 |
| HIV-001428-2.42_N276A   | 2    | C     | NN       | 0.53909  | 12.40000 | 0.01435  | 0.53000 | 0.00155 | 0.01100 | 0.00002 | NN  | NN       | NN  | 2.46747  | NN       | 2.00477 | ND       | 0.94445 | NN      | NN       | 0.00550 | 0.00240 |
| 3301.v1.c24_N276A       | 2    | AC    | NN       | 39.31180 | NN       | 0.76253  | NN      | 0.03244 | 0.20735 | 0.00001 | NN  | NN       | NN  | 12.53858 | NN       | 1.56525 | NN       | 0.13680 | NN      | NN       | 0.09000 | 0.00340 |
| 6041.v3.c23_N276A       | 2    | AE    | NN       | 7.14739  | NN       | NN       | NN      | NN      | NN      | 2.56698 | NN  | NN       | NN  | NN       | NN       | NN      | NN       | NN      | NN      | NN       | 0.00900 | 0.00290 |
| 92TH021_N276A           | 2    | AE    | NN       | NN       | NN       | NN       | NN      | NN      | NN      | 2.80218 | NN  | NN       | NN  | NN       | NN       | NN      | NN       | NN      | NN      | NN       | 0.06000 | 0.01000 |
| 191084 B7-19_N276D      | 2    | A     | 0.11201  | 0.00295  | 0.14182  | 0.00439  | 0.01806 | 0.00282 | 0.00795 | 0.00024 | NN  | 1.01321  | NN  | 0.29781  | 0.02558  | 0.00074 | 0.01150  | 0.00127 | NN      | 36.73057 | 0.02700 | 0.00520 |
| SC422661.8_N276D        | 2    | B     | 35.10128 | NT       | NN       | NT       | 0.25366 | NT      | 0.00585 | NT      | NN  | ND       | NN  | ND       | 7.82172  | NT      | 4.75373  | NT      | NN      | ND       | 0.01000 | NT      |
| HIV-001428-2.42_N276D   | 2    | C     | 1.79904  | 0.00389  | 0.45619  | 0.00137  | 0.01341 | 0.00123 | 0.00114 | 0.00001 | NN  | 99.53962 | NN  | 1.30816  | 2.16156  | 0.00392 | 5.18986  | 0.01404 | NN      | ND       | 0.01000 | 0.00230 |
| HIV-0815.v3.c3_N276D    | 2    | ACD   | 4.16580  | NT       | 9.12986  | NT       | NN      | NT      | 0.04374 | NT      | NN  | ND       | NN  | ND       | NN       | NT      | NN       | NT      | NN      | ND       | 0.00780 | NT      |
| MLV                     |      |       | NN       | NN       | NN       | NN       | NN      | NN      | NN      | NN      | NN  | NN       | NN  | NN       | NN       | NN      | NN       | NN      | NN      | NN       | NN      | NN      |

**Figure S5. Pseudovirus neutralization by post-immunization VRC01<sup>9HL</sup> mAbs, related to Figure 6.**

Individual pseudovirus neutralization assay IC<sub>50</sub> (µg/mL) values graphed in Figure 6. The indicated ΔN276 viruses were produced in HEK293T (T) or HEK293S (S) cells. Murine leukemia virus (MLV) was used as a negative control. ND = Not determined; NN = IC<sub>50</sub> > 100 µg/mL, no neutralization; NT = No virus titer. Data shown is an average of two experiments.
